# Supplementary material for: Medicinal Use of Different Cannabis Strains: Results from a Large Prospective Survey in Germany
Source: PubMed Central journal article supplement — Pharmacopsychiatry. 2024 Mar 12;57(3):133–40. doi: 10.1055/a-2261-2269 (PMC11076101; doi:10.1055/a-2261-2269), 2024-03-12

## Supplementary Material

Supplementary Table 1. Cannabis strains available in Germany in 2020 at the time of study conduction included in the survey in alphabetical order (N=43). Characteristics of strains are described according to [24], [25].

| Strain                             | THC % | CBD % | Type of strain | Cultivar                               |
|------------------------------------|-------|-------|----------------|----------------------------------------|
| Argyle                             | 5.4   | 7     | Indica         |                                        |
| Aurora 1/12                        | 0.5   | 12.5  | Hybrid         | Cannatonic                             |
| Aurora 1/15                        | 1     | 15    | Hybrid         |                                        |
| Bakerstreet                        | 18.9  | 0.5   | Indica         | Hindu Kush,<br>Herijuana &<br>Afghanic |
| Bedica                             | 15.8  | 0.1   | Indica         |                                        |
| Bediol                             | 6.3   | 8.3   | Sativa         | Elida, Jack Herres<br>& Afganic        |
| Bedrobinol                         | 13.1  | 0.1   | Hybrid         |                                        |
| Bedrocan                           | 21.7  | 0.1   | Hybrid         | Jack Herres                            |
| Bedrolite                          | 1     | 9     | Sativa         |                                        |
| Cannamedical Hybrid Forte Headband | 24    | 1     | Hybrid         | Headband                               |
| Cannamedical Hybrid Jean Guy       | 20    | 1     | Hybrid         | Jean Guy                               |
| Cannamedical Hybrid Light Jean Guy | 16    | 1     | Hybrid         | Light Jean Guy                         |
| Cannamedical Hybrid Vita           | 13.5  | 1     | Hybrid         |                                        |
| Cannamedical Indica Forte          | 24    | 1     | Indica         |                                        |
| Cannamedical Indica Light Mango    | 16    | 1     | Indica         | Mango                                  |
| Cannamedical Indica Sirius         | 20    | 1     | Indica         | Sirius                                 |

|                           |       |      |        |                   |
|---------------------------|-------|------|--------|-------------------|
| Cannamedical Indica Vita  | 13.5  | 1    | Indica |                   |
| Cannamedical Sativa       | 20    | 1    | Sativa |                   |
| Cannamedical Sativa Forte | 24    | 1    | Sativa |                   |
| Cannamedical Sativa Light | 16    | 1    | Sativa | Amnesia Haze      |
| Cannamedical Sativa Vita  | 13.5  | 1    | Sativa | Amnesia Haze      |
| Green no. 3               | 8.1   | 11.1 | Hybrid |                   |
| Klenk 18/1                | 19.6  | 0.1  | Hybrid |                   |
| Natural 18/1 CA Indica    | 18    | 1    | Indica |                   |
| Natural 25/1 CA Hybrid    | 25    | 1    | Hybrid |                   |
| Orange no. 1              | 11.56 | 0.5  | Indica |                   |
| Peace Naturals 14/1       | 14.3  | 0.3  | UN     |                   |
| Peace Naturals 16/1       | 15.7  | 0.3  | Hybrid |                   |
| Peace Naturals 18/1       | 16.6  | 0.3  | Indica |                   |
| Peace Naturals 20/1       | 20.4  | 1    | Indica |                   |
| Pedarios 14/1             | 14.3  | 0.3  | Sativa | Banana Split      |
| Pedarios 16/1             | 16    | 1    | UN     |                   |
| Pedarios 18/1             | 18    | 1    | Indica | Sour Tangie       |
| Pedarios 20/1             | 19.3  | 0.1  | Indica | L.A. Confidential |
| Pedarios 22/1             | 21.4  | 1    | Sativa | Ghost Train Haze  |
| Pedarios 8/8              | 7.6   | 8    | Hybrid |                   |
| Penelope                  | 8.6   | 6.9  | Hybrid | CBD Skunk Haze    |
| Red no. 2                 | 16.1  | 0.5  | Sativa | Lemon Skunk       |

|                             |      |     |        |                  |
|-----------------------------|------|-----|--------|------------------|
| Red no. 4                   | 19.5 | 0.5 | Indica | Crimea Blueberry |
| Tilray THC 10/CBD 10        | 10   | 10  | Hybrid | Warlock CBD      |
| Tilray THC 25 (Headband)    | 23.3 | 1   | Sativa | Headband         |
| Tilray THC 25 (Rockstar)    | 24.5 | 1   | Indica | Rockstar         |
| Tilray THC25 Hybrid (Purps) | 25.4 | 1   | Hybrid | Purps            |

THC – tetrahydrocannabinol, CBD – cannabidiol, UN – unknown

Supplementary Table 2. Indications for medicinal cannabis (MC) specified by diseases and diagnostic categories, as well as treatment time (ever versus currently) in 1,028 patients. The table shows the number of patients who selected a particular disease as an indication for MC use, and the number of indications in the selected disease category. For example, 659 participants selected the category of pain syndromes in the category “ever treated.” Since multiple selections in this category were possible, altogether 1,277 pain syndromes were selected, which constituted 34.3% of all listed disorders. In contrast, in the category of the current indication (“currently treated”), each participant could only select one disease; therefore, the number of participants in each group and the number of selections are identical. The indications selected >100 times for “ever treated” are listed in italics.

| Disease belonging to the particular category | Ever treated |              | Currently treated |             |
|----------------------------------------------|--------------|--------------|-------------------|-------------|
|                                              | N (%)        | Sum (N, %)   | N (%)             | Sum (N, %)  |
| <b>Pain syndromes</b>                        | 659          | 1277 (34.3%) | 441               | 441 (42.9%) |
| Chronic pain                                 | 273 (7.3%)   |              | 120 (11.7%)       |             |
| <i>Musculoskeletal pain</i>                  | 377 (10.1%)  |              | 123 (12.0%)       |             |
| <i>Neuropathic pain</i>                      | 224 (6.0%)   |              | 60 (5.8%)         |             |
| Pain in MS                                   | 28 (0.8%)    |              | 11 (1.1%)         |             |
| Pain provoked by paresis                     | 25 (0.7%)    |              | 9 (0.9%)          |             |
| Fibromyalgia                                 | 82 (2.2%)    |              | 31 (3.0%)         |             |

|                                       |            |              |             |             |
|---------------------------------------|------------|--------------|-------------|-------------|
| <i>Migraine and other headaches</i>   | 182 (4.9%) |              | 64 (6.2%)   |             |
| Endometriosis                         | 9 (0.2%)   |              | 2 (0.2%)    |             |
| Other pain syndromes                  | 77 (2.1%)  |              | 21 (2.0%)   |             |
| <b>Neurological disorders</b>         | 239        |              | 125         |             |
| Spasticity in MS                      | 44 (1.2%)  |              | 25 (2.4%)   |             |
| Other symptoms in MS                  | 42 (1.1%)  |              | 14 (1.4%)   |             |
| Spasticity in ALS                     | 1 (0.0%)   |              | 0 (0%)      |             |
| Spasticity related to paresis         | 7 (0.2%)   |              | 1 (0.1%)    |             |
| Spasticity related to other disorders | 27 (0.7%)  |              | 5 (0.5%)    |             |
| Parkinson's disease                   | 3 (0.1%)   |              | 1 (0.1%)    |             |
| Dystonia                              | 6 (0.2%)   | 339 (9.1%)   | 0 (0.0%)    | 125 (12.2%) |
| Tourette syndrome                     | 27 (0.7%)  |              | 24 (2.3%)   |             |
| RLS                                   | 93 (2.5%)  |              | 31 (3.0%)   |             |
| Essential tremor                      | 6 (0.2%)   |              | 0 (0%)      |             |
| Epilepsy                              | 22 (0.6%)  |              | 10 (1%)     |             |
| TBI/Stroke                            | 16 (0.4%)  |              | 2 (0.2%)    |             |
| Other neurological disorders          | 45 (1.2%)  |              | 12 (1.2%)   |             |
| <b>Psychiatric disorders</b>          | 517        |              | 303         |             |
| <i>ADHD</i>                           | 213 (5.7%) |              | 133 (12.9%) |             |
| <i>PTSD</i>                           | 143 (3.8%) | 1295 (34.7%) | 56 (5.4%)   | 303 (29.5%) |
| <i>Sleeping problems</i>              | 297 (8.0%) |              | 32 (3.1%)   |             |
| OCD                                   | 31 (0.8%)  |              | 1 (0.1%)    |             |

|                                     |            |            |           |           |
|-------------------------------------|------------|------------|-----------|-----------|
| Autism                              | 21 (0.6%)  |            | 9 (0.9%)  |           |
| <i>Depression</i>                   | 302 (8.1%) |            | 43 (4.2%) |           |
| <i>Anxiety</i>                      | 200 (5.4%) |            | 21 (2.0%) |           |
| Substance abuse disorder            | 57 (1.5%)  |            | 2 (0.2%)  |           |
| Other psychiatric disorders         | 28 (0.8%)  |            | 6 (0.6%)  |           |
| <b>Gastrointestinal diseases</b>    | 212        |            | 51        |           |
| <i>IBD</i>                          | 61 (1.6%)  |            | 31 (3.0%) |           |
| Nausea related to chemotherapy      | 4 (0.1%)   | 262 (7.0%) | 1 (0.1%)  | 51 (5.0%) |
| Nausea related to IBS               | 55 (1.5%)  |            | 3 (0.3%)  |           |
| Other GI disorders                  | 41 (1.1%)  |            | 4 (0.4%)  |           |
| <b>Pulmonary disorders</b>          | 96         |            | 13        |           |
| Asthma                              | 71 (1.9%)  | 107 (2.9%) | 9 (0.9%)  | 13 (1.3%) |
| COPD                                | 17 (0.5%)  |            | 2 (0.2%)  |           |
| Other pulmonary disorders           | 19 (0.5%)  |            | 2 (0.2%)  |           |
| <b>Skin conditions</b>              | 103        |            | 24        |           |
| Pruritus                            | 33 (0.9%)  |            | 4 (0.4%)  |           |
| Sweating                            | 18 (0.5%)  | 139 (3.7%) | 3 (0.3%)  | 24 (2.3%) |
| Acne inversa                        | 20 (0.5%)  |            | 11 (1.1%) |           |
| Psoriasis                           | 29 (0.8%)  |            | 3 (0.3%)  |           |
| Other skin conditions               | 39 (1.0%)  |            | 3 (0.3%)  |           |
| <b>Otolaryngological conditions</b> | 65         |            | 11        |           |
| Tinnitus                            | 56 (1.5%)  | 72 (1.9%)  | 8 (0.8%)  | 11 (1.1%) |

|                                                      |            |            |           |           |
|------------------------------------------------------|------------|------------|-----------|-----------|
| Other otolaryngological conditions                   | 16 (0.4%)  |            | 3 (0.3%)  |           |
| <b>Ophthalmological conditions</b>                   | 18         |            | 2         |           |
| Glaucoma                                             | 8 (0.2%)   | 19 (0.5%)  | 1 (0.1%)  | 2 (0.2%)  |
| Other ophthalmological conditions                    | 11 (0.3%)  |            | 1 (0.1%)  |           |
| <b>Other diseases belonging to internal medicine</b> | 101        |            | 23        |           |
| Loss of appetite in AIDS                             | 4 (0.1%)   |            | 1 (0.1%)  |           |
| Loss of appetite in cancer                           | 14 (0.4%)  |            | 2 (0.2%)  |           |
| Loss of appetite related to aging                    | 7 (0.2%)   | 114 (3.1%) | 0 (0%)    | 23 (2.2%) |
| Diabetes                                             | 17 (0.5%)  |            | 0 (0%)    |           |
| Rheumatologic arthritis                              | 46 (1.2%)  |            | 16 (1.6%) |           |
| Other diseases in this category                      | 26 (0.7%)  |            | 4 (0.4%)  |           |
| <b>Other diseases</b>                                | 104 (2.8%) | 104 (2.8%) | 35 (3.4%) | 35 (3.4%) |

MS – multiple sclerosis, ALS – amyotrophic lateral sclerosis, RLS – restless legs syndrome, TBI – traumatic brain injury, ADHD – attention-deficit/hyperactivity disorder, PTSD – post-traumatic stress disorder, OCD – obsessive-compulsive disorder, IBD – inflammatory bowel disease, IBS – irritable bowel syndrome, GI – gastrointestinal, COPD – chronic obstructive pulmonary disease, AIDS – acquired immunodeficiency syndrome

Supplementary Figure 1. Concentrations of tetrahydrocannabinol to cannabidiol (THC:CBD) in medical cannabis strains “frequently” prescribed (defined as > 30 times, N=1,028 patients).

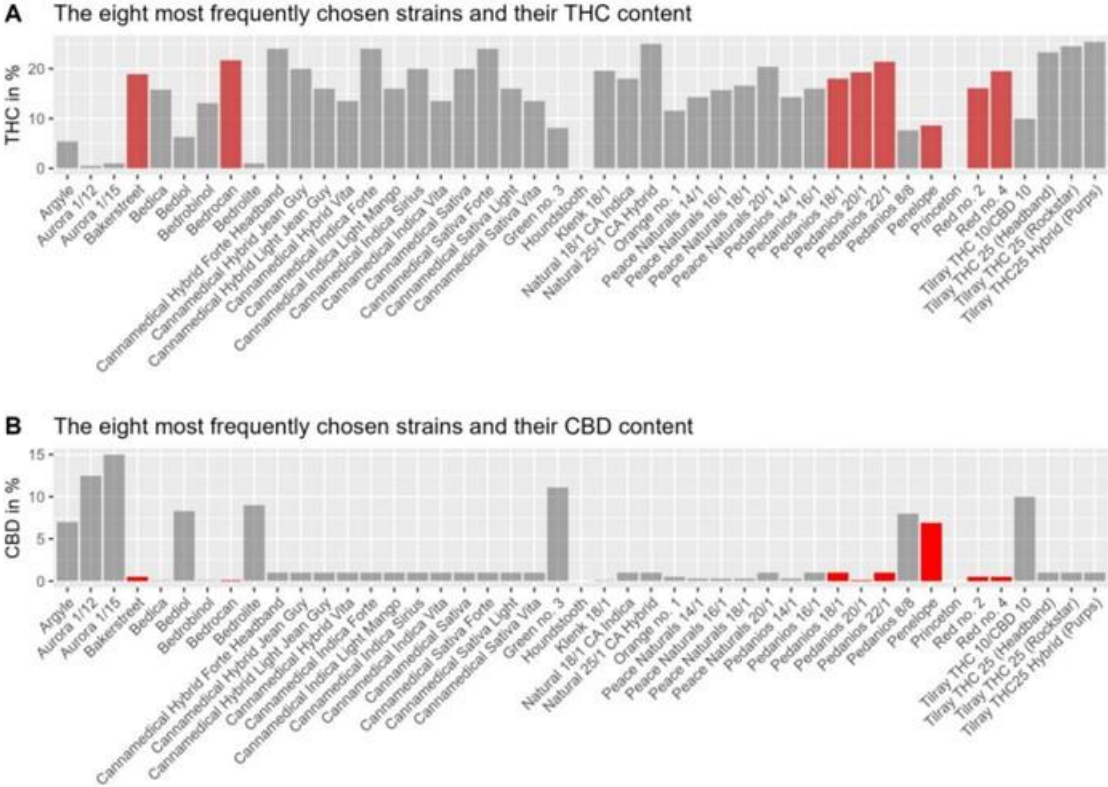

Supplementary Figure 2. Patient-reported effectiveness of different medical cannabis (MC) strains used as first choice (mean efficacy = 80.1%, range, 6-100%) rated on a scale ranging from 0% (=no effect) to 100% (=optimal effect/symptom free).

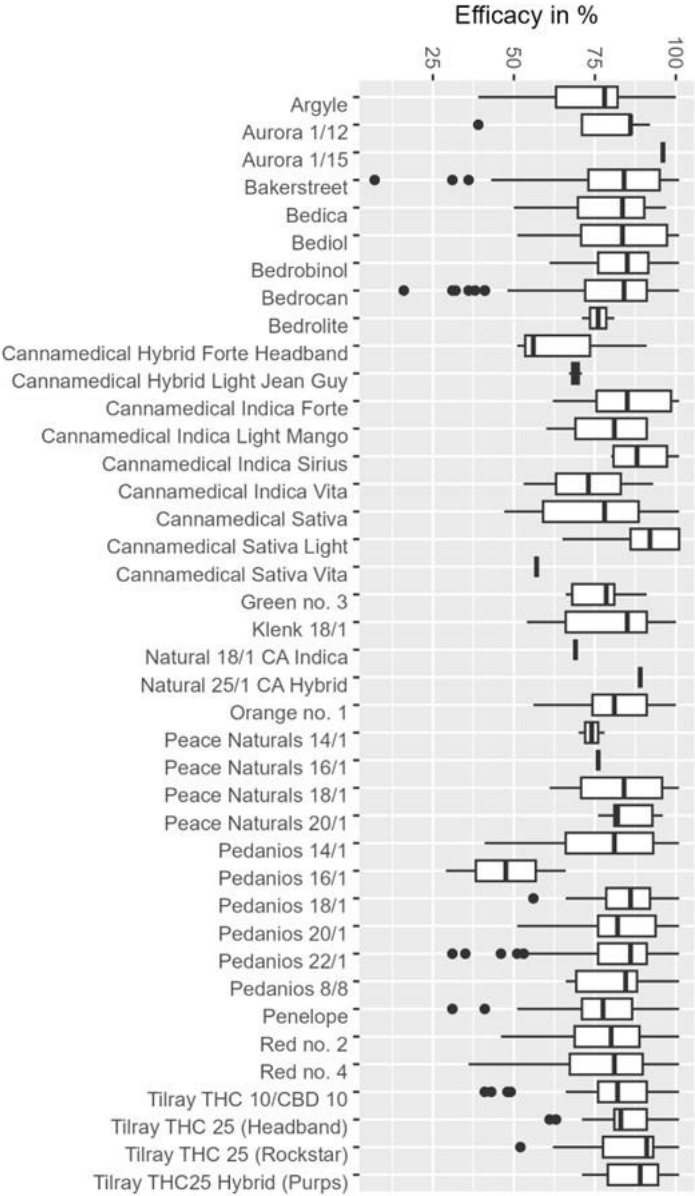

Supplement: 10-1055-a-2261-2269-2023-08-1211.pdf [file 10-1055-a-2261-2269-2023-08-1211.pdf]
